# Supplementary figures and images for: Transgenic Cotton Plants Overexpressing GhKAR or GhENR Exhibit Increased Seed Oil Content
Source: Preprints.org preprint supplement (doi:10.20944/preprints202308.0498.v1), 2023-08-07

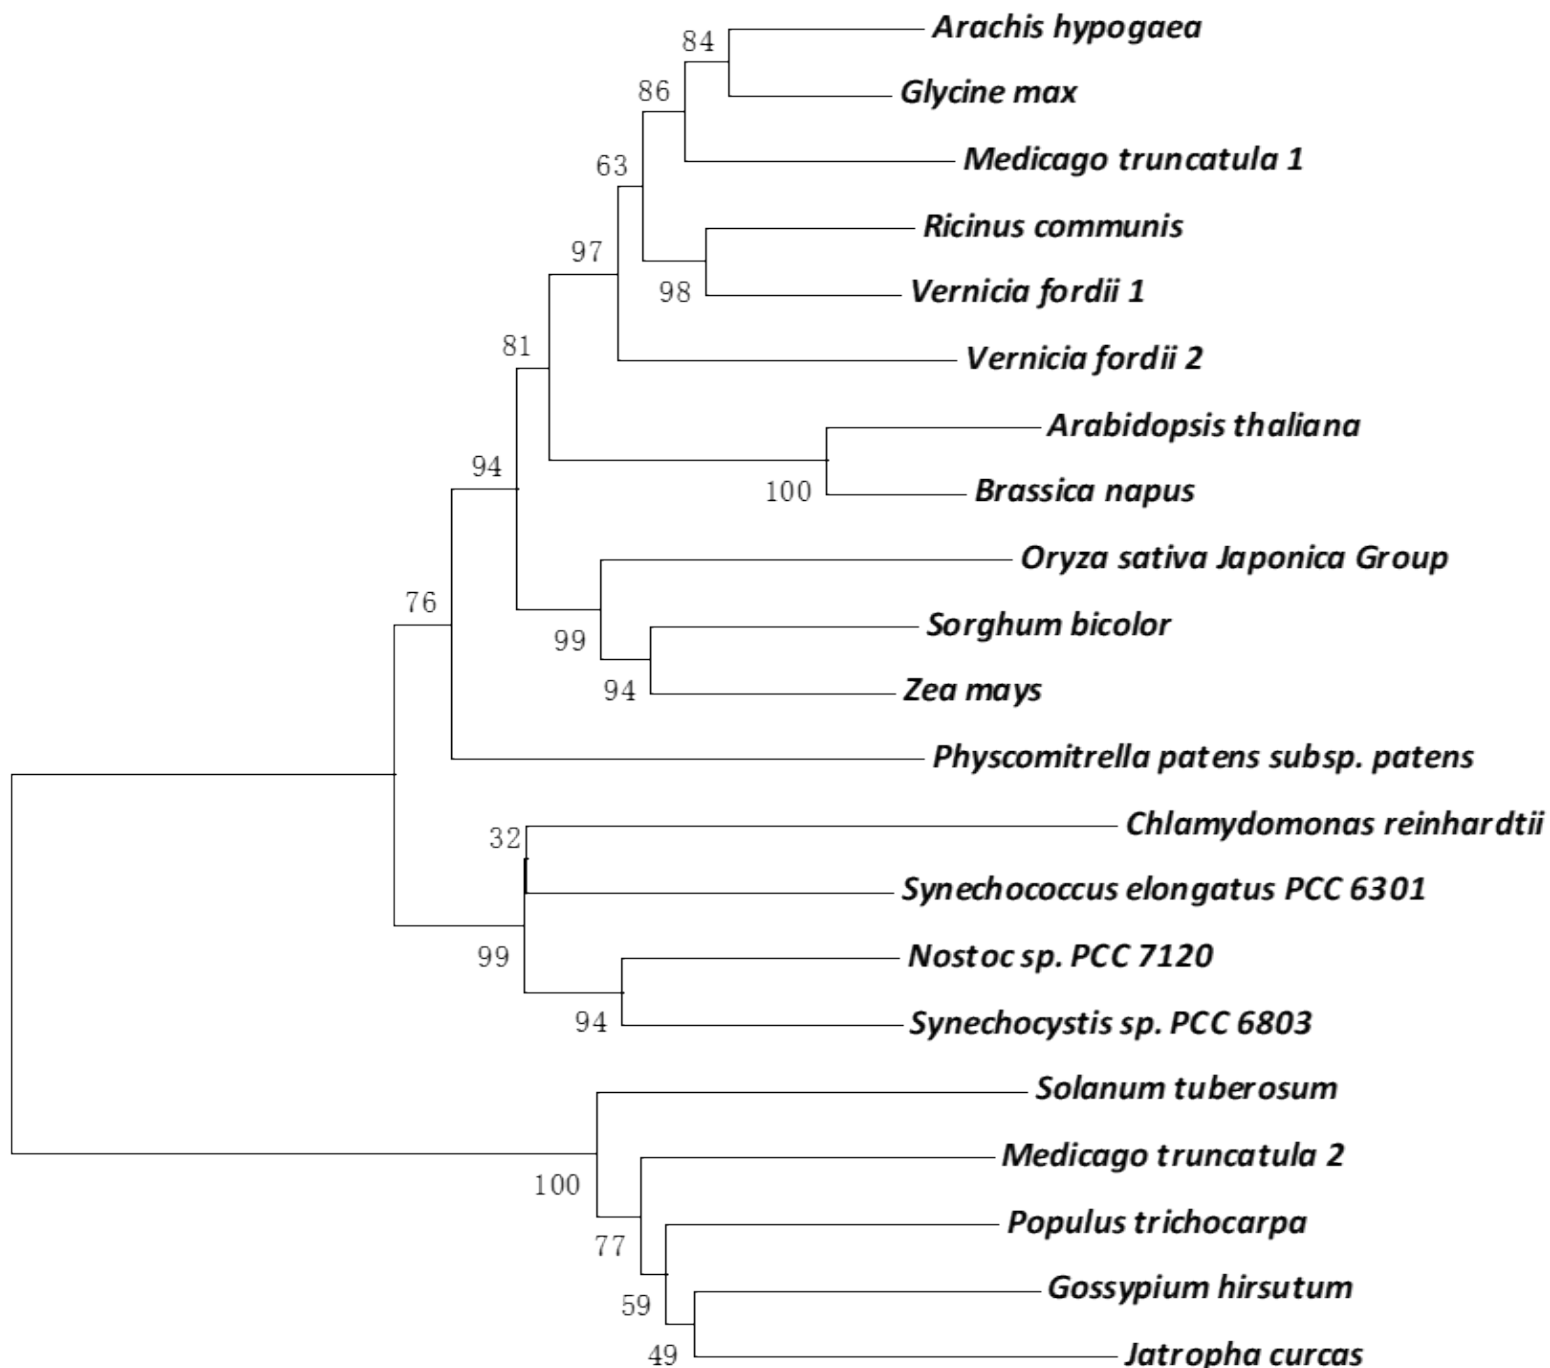

0.05

Supplement: Supplementary file 1 [file Figure%20S1.pdf]

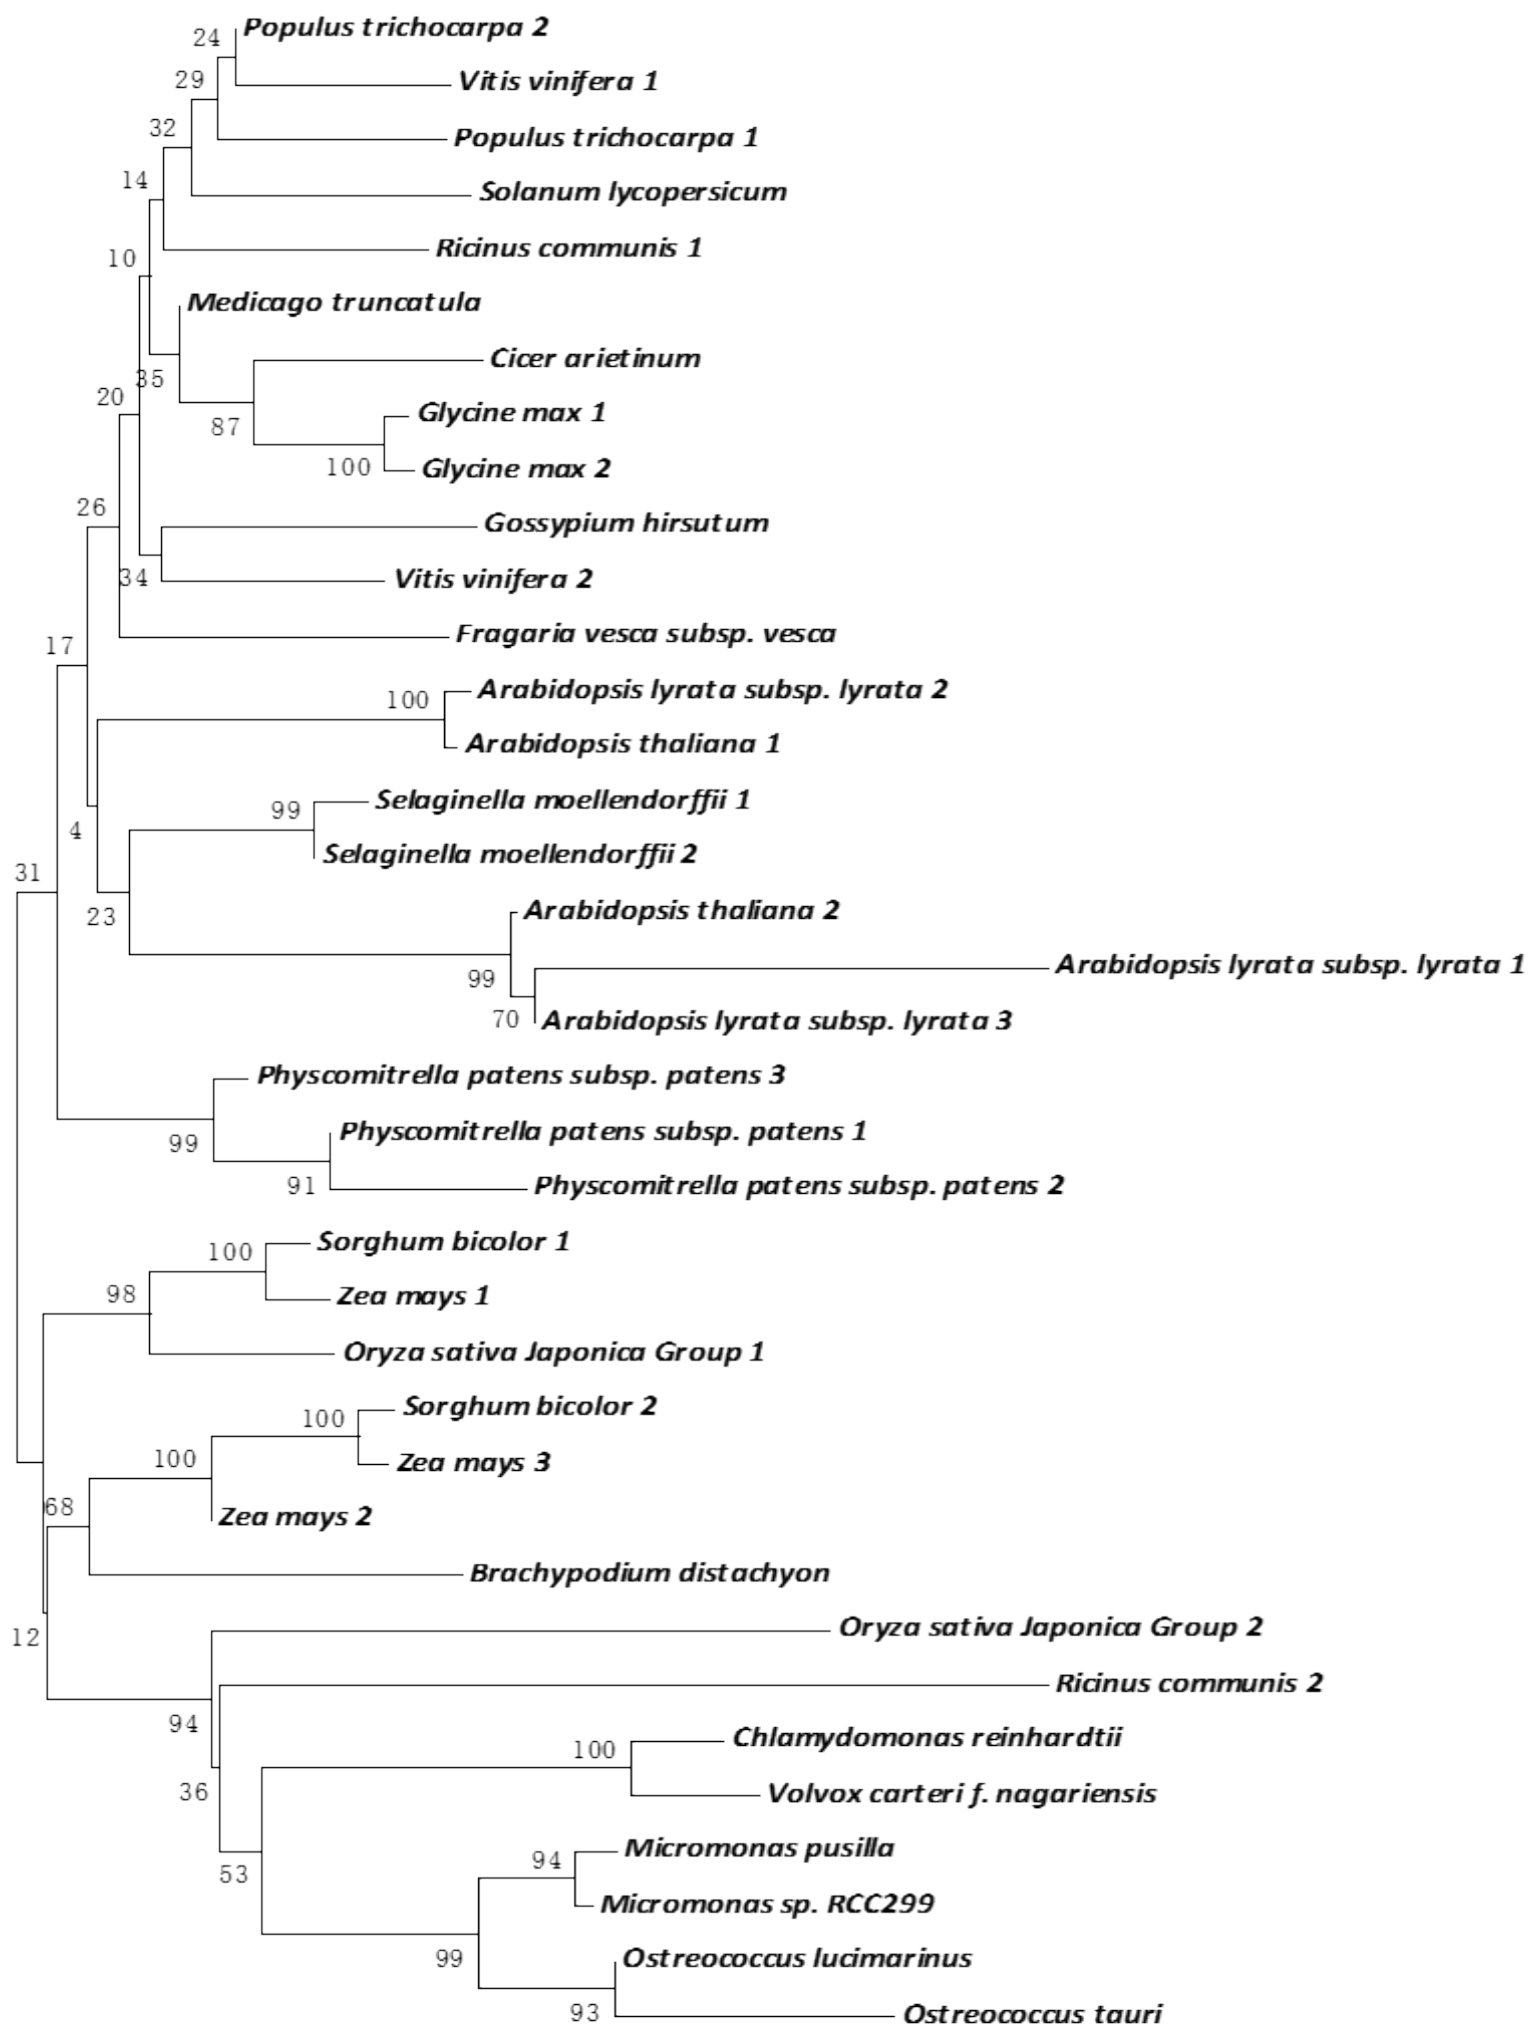

0.05

Supplement: Supplementary file 2 [file Figure%20S2.pdf]

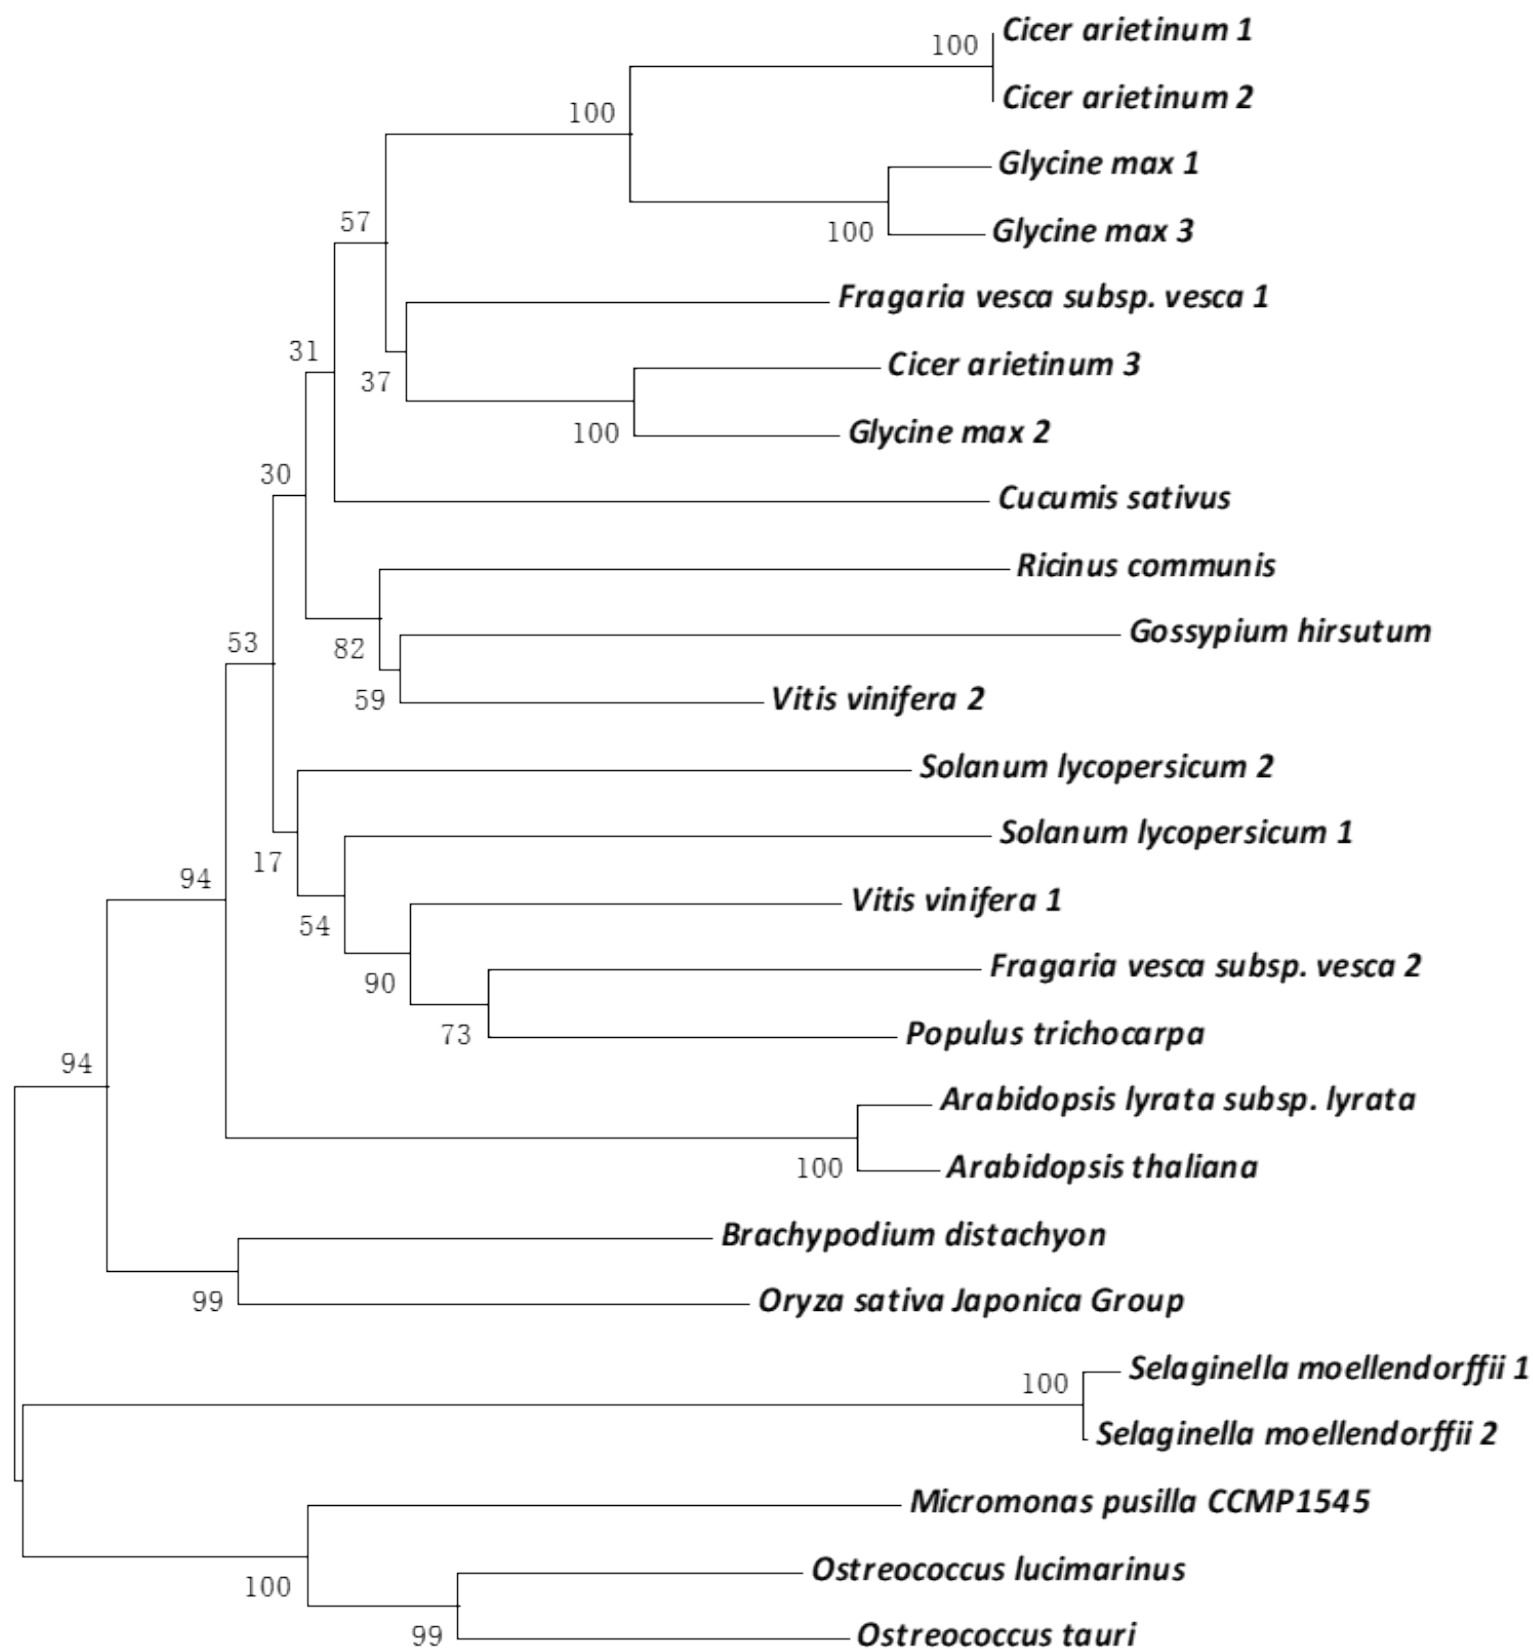

0.05

Supplement: Supplementary file 3 [file Figure%20S3.pdf]
